# Supplementary material
Source: PubMed Central journal article supplement (PMC4865434)
Supplement: NIHMS768247-supplement-Online_supplement.pdf [file NIHMS768247-supplement-Online_supplement.pdf]

## ONLINE SUPPLEMENT

### **PPAR $\gamma$ Level Contributes to Structural Integrity and Component Production of Elastic Fibers in the Aorta**

Haw-Chih Tai, MS<sup>1,2</sup>; Pei-Jane Tsai, PhD<sup>3</sup>; Ju-Yi Chen, MD, PhD<sup>1,2,4</sup>; Chao-Han Lai, MD, PhD<sup>1,2,5</sup>; Kuan-Chieh Wang, PhD<sup>2,6</sup>; Shih-Hua Teng, PhD<sup>7</sup>; Shih-Chieh Lin, PhD<sup>8</sup>; Alice Y.W. Chang<sup>8</sup>; Meei-Jyh Jiang, PhD<sup>2,9</sup>; Yi-Heng Li, MD, PhD<sup>2,4</sup>; Hua-Lin Wu, PhD<sup>2,6</sup>; Nobuyo Maeda, PhD<sup>10</sup>; and Yau-Sheng Tsai, PhD<sup>1,2,11</sup>

<sup>1</sup>Institute of Clinical Medicine, <sup>2</sup>Cardiovascular Research Center, <sup>3</sup>Department of Medical Laboratory Science and Biotechnology, <sup>6</sup>Department of Biochemistry and Molecular Biology, <sup>8</sup>Department of Physiology, and <sup>9</sup>Department of Cell Biology and Anatomy, National Cheng Kung University, Tainan, Taiwan, ROC; <sup>4</sup>Department of Internal Medicine, <sup>5</sup>Department of Surgery, and <sup>11</sup>Research Center of Clinical Medicine, National Cheng Kung University Hospital, College of Medicine, National Cheng Kung University, Tainan, Taiwan, ROC; <sup>7</sup>Graduate Institute of Biomedical Sciences, Chang Gung University, Taoyuan, Taiwan, ROC; <sup>10</sup>Department of Pathology and Laboratory Medicine, University of North Carolina at Chapel Hill, Chapel Hill, NC, USA

#### **Address Correspondence to:**

Yau-Sheng Tsai, 1 University Road, National Cheng Kung University, Tainan 701, Taiwan.  
Phone: 886-6-2353535-4242; Fax: 886-6-2758781; E-mail: yaustsai@mail.ncku.edu.tw

## Supplemental Methods

### Mice

Generation of mice carrying the modified *Pparg* locus has been described.<sup>1</sup> *Pparg*<sup>C/C</sup>, *Pparg*<sup>C/+</sup>, and *Pparg*<sup>+/+</sup> mice were littermates of F2 generation from a cross between 129S6 and C57BL/6J F1 heterozygotes. The *Pparg*-C allele was subsequently placed on a C57BL/6J background by backcrossing for eight generations. *Pparg*<sup>+/+</sup>, *Pparg*<sup>+/-</sup> and *Pparg*<sup>C/-</sup> mice were F1 littermates from the mating of *Pparg*<sup>C/+</sup> mice on a C57BL/6J background with *Pparg*<sup>+/-</sup> mice on a 129S6 background (kindly provided by Dr. Ronald Evans at the Salk Institute).<sup>2</sup> For AngII infusion, anesthetized mice received subcutaneous implantation of ALZET osmotic minipumps (1004; DURECT Corporation), delivering AngII (A9525; Sigma-Aldrich) at 500 or 1000 ng/min/kg for 4 weeks. All AngII-infused mice were fed a western diet (D12079B; Research Diets). Doxycycline hyclate (D9891; Sigma-Aldrich) was administered in drinking water, covered with aluminum foil, at a dose of 30 mg/kg/day and prepared fresh every other day. Mice were anesthetized by intraperitoneal injection of Zoletil-Rompun mixture (1 ml Zoletil<sup>®</sup> (50mg/ml) + 0.1ml Rompun<sup>®</sup> + 3.9 ml normal saline) · 0.1 ml mixture per 20 g mouse body weight. Mice were housed in a specific pathogen-free barrier facility with the humidity and temperature controlled. All animal studies were performed according to protocols approved by the Institutional Animal Care and Use Committee of National Cheng Kung University.

### Measurements of Blood Pressure

Blood pressure was measured in conscious mice by using the tail cuff blood pressure measurement system (BP-2000; Visitech Systems). The mice were training for 2 days. Blood pressures were measured 20 times per day for 3 consecutive days. The results were calculated as the average from three trials of five to ten measurements each day for 3 consecutive days. For continuous BP recording, a telemetric device (PA-C20; Data Sciences International) was implanted via the left carotid artery into the aorta. Continuous BP results were recorded every 5 minutes for 14 days beginning 10 days after surgery to allow mice to recover normal diurnal rhythms.

### Immunohistochemical Staining

Paraffin-embedded sections (5  $\mu$ m) were deparaffinized and rehydrated. Antigen retrieval was conducted by boiling sections in 10 mmol/L sodium citrate buffer at pH 6.0 for 10 min. Sections were incubated with primary antibodies against PPAR $\gamma$  (sc-7196; Santa Cruz Biotechnology), MMP-9 (AB19016; Millipore), SActin (A2547; Sigma-Aldrich), FAP (ab53066; Abcam), MOMA-1 (GTX42355; GeneTex), CD68 (M081401; Dako) and Ki-67 (ab15580; Abcam). Secondary antibody staining (VECTASTAIN ABC kit; Vector

Laboratories) was performed. Slides were developed using 3, 3'-diaminobenzidine substrate-chromogen solution (K3468; Dako) and counterstained with hematoxylin. The specificity of PPAR $\gamma$  antibody was confirmed by negative control procedures, including no primary antibody control, primary antibody isotype control, and no antigen retrieval, which gave consistently negative results (Figure S1).

### **Consistency of Elastic Lamella**

Consistency of elastic lamella was determined by the ratio of the length of elastic fibers with constant thickness to the length of the medial area section. The number of elastin breaks was counted and divided by the medial area.

### **RNA Analysis**

Aortic tissues were stored in RNAlater (Ambion). Total RNA was extracted with REzol (Protech Technology Enterprise). Level of mRNA was analyzed with SYBR green-based real-time quantitative RT-PCR assays (StepOne; Applied Biosystems), with  $\beta$ -actin as the reference gene in each reaction. Sequences of the primers used for real-time PCR assays are shown in Table S5.

### **Immunoblot Analysis**

Twenty micrograms of total proteins were subjected to electrophoresis, transferred to PVDF membranes, and probed with antibodies against tropoelastin (CL55041AP; Cedarlane), collagen type I (234167; Calbiochem), fibulin-4 (36475; Epitomics), fibulin-5 (12188-1-AP; Protein Tech), MMP-9 (AB19016; Millipore), PPAR $\gamma$  (2443; Cell signaling), PPAR $\gamma$  P-Ser112 (ab60953; Abcam), Cathepsin S (ab18822; Abcam) and  $\alpha$ -tubulin (T5168; Sigma-Aldrich). Immunoreactive detection was performed with a chemiluminescent detection system (RPN2106; GE Healthcare).

### **Proteomics Analysis**

The insoluble pellets of homogenized aortas (100  $\mu$ g for each aorta) were used for in-solution trypsin digestion. The LC-MS/MS (HCT ultra ion trap MS; Bruker) was performed with a HPLC system (UltiMate 3000; Dionex). The sample was injected into a trap column (Acclaim PepMap100, 164199; Dionex). The trapped analyses were separated by an analytical column (Acclaim PepMap100, 164261; Dionex). Three MS only and 1 autoMSMS runs were performed for each sample. The LC-MS/MS spectra were analyzed for peptide identification by Swissport (release 56.1) database with the search engine MASCOT (version 2.2.07). The relative protein abundance based on a label free quantitative analysis was expressed as the ratio of *Pparg*<sup>C/-</sup> to *Pparg*<sup>+/+</sup> by ProteinScape 3.0 (Bruker Daltonics).

## **Gelatin Zymography**

Aortic lysates were subjected to electrophoresis on 8% SDS-PAGE co-polymerized with 1% gelatin as the substrate. The gel was incubated at room temperature for 1 h in renaturing buffer, and incubated at 37°C for 24 h in developing buffer. The gels were stained with 0.05% Coomassie Brilliant Blue, and then destained with destain buffer.

## **Ultrasound Imaging**

Ultrasound imaging was performed using a high-resolution ultrasound imaging system (Vevo 770; VisualSonics) with 40 MHz frequency real-time microvisualization scanhead (RMV 704). Mice were placed in a supine position on a heating pad under isoflurane anesthesia and depilated with hair removal cream. The 2D imaging in B-mode was used to localize the suprarenal abdominal aorta and the cross-sectional view was recorded to measure the diameter of aortic lumen.

## **Cell Culture**

Human aortic smooth muscle cells (HASMCs, C-007-5C; Life Technologies) and human aortic adventitial fibroblasts (HAoAFs, CC-7014; Lonza) were derived from thoracic aorta. The culture protocols of human cells were followed the manufacturer's instructions. Rat aortic smooth muscle cells (ASMCs) and mouse embryonic fibroblasts (MEFs) were grown in DMEM containing penicillin/streptomycin supplemented with 10% FBS. Cells were treated with various stimuli for 24 hours and collected for mRNA analysis. For small interfering RNA (siRNA) knockdown, a final concentration of 40 nmol/L siRNA against PPAR $\gamma$  (s72013; Ambion) and scrambled control siRNA were transfected into MEFs by Lipofectamine 3000 (Life Technologies) and incubated for 3 days.

## **Chromatin Immunoprecipitation (ChIP) Assay**

The procedure for ChIP was described previously.<sup>3</sup> In brief, the interaction between protein and DNA was fixed by using 1% formaldehyde for 10 minutes. Cells were harvested and sonicated to fragment DNA (average size of 200–500 bp). PPAR $\gamma$  antibody (ab41928; Abcam) was used to immunoprecipitate the PPAR $\gamma$  protein and DNA complexes. Potential PPAR $\gamma$  binding sites were amplified by specific primers (Table S5) after reversing cross-linking.

## References

1. Tsai YS, Tsai PJ, Jiang MJ, Chou TY, Pendse A, Kim HS, Maeda N. Decreased ppar gamma expression compromises perigonadal-specific fat deposition and insulin sensitivity. *Mol Endocrinol.* 2009;23:1787-1798.
2. Barak Y, Nelson MC, Ong ES, Jones YZ, Ruiz-Lozano P, Chien KR, Koder A, Evans RM. Ppar gamma is required for placental, cardiac, and adipose tissue development. *Mol Cell.* 1999;4:585-595.
3. Lin SC, Chien CW, Lee JC, Yeh YC, Hsu KF, Lai YY, Lin SC, Tsai SJ. Suppression of dual-specificity phosphatase-2 by hypoxia increases chemoresistance and malignancy in human cancer cells. *J Clin Invest.* 2011;121:1905-1916.

**Table S1.** Aortic geometry of *Pparg*<sup>+/+</sup> and *Pparg*<sup>C/-</sup> mice.

| <b>Parameters</b>                 | <b>+/+ (n=5)</b> | <b>C/- (n=5)</b> | <b>P-value</b> |
|-----------------------------------|------------------|------------------|----------------|
| Media thickness ( $\mu\text{m}$ ) | 44.34 $\pm$ 3.71 | 41.53 $\pm$ 3.71 | 0.67           |
| Lumen CSA ( $\text{mm}^2$ )       | 0.34 $\pm$ 0.05  | 0.33 $\pm$ 0.06  | 0.89           |
| Media CSA ( $\text{mm}^2$ )       | 0.09 $\pm$ 0.01  | 0.11 $\pm$ 0.01  | 0.57           |
| Lumen / media ratio               | 3.31 $\pm$ 0.45  | 3.54 $\pm$ 0.52  | 0.76           |
| Perimeter (mm)                    | 2.54 $\pm$ 0.12  | 2.43 $\pm$ 0.14  | 0.57           |

CSA: cross-section area. *P*-value is resulted from Student's *t* test.

**Table S2.** Protein identified by a LC/MS-based label-free quantitative proteomic analysis in the insoluble fraction of aortic lysate.

| <b>Protein description</b>                                           | <b>Ratio (C/- : +/+)</b> | <b>Quantifiable peptides</b> | <b>Identified peptides</b> | <b>Biological process</b>                    |
|----------------------------------------------------------------------|--------------------------|------------------------------|----------------------------|----------------------------------------------|
| Fibulin-5                                                            | 0.61                     | 7                            | 9                          | Elastic fiber assembly                       |
| Hemoglobin subunit alpha                                             | 0.71                     | 5                            | 7                          | Oxygen transport                             |
| Periostin                                                            | 0.72                     | 8                            | 23                         | Extracellular matrix organization            |
| Histone H4                                                           | 0.81                     | 3                            | 6                          | DNA-binding                                  |
| Cysteine and glycine-rich protein 1                                  | 0.81                     | 3                            | 8                          | Actin cytoskeleton organization              |
| Calponin-1                                                           | 0.82                     | 4                            | 8                          | Muscle contraction                           |
| Elastin                                                              | 0.82                     | 7                            | 11                         | Elastic fiber assembly                       |
| Tropomyosin beta chain                                               | 0.83                     | 4                            | 12                         | Muscle contraction                           |
| Collagen alpha-2(VI) chain                                           | 0.84                     | 8                            | 21                         | Extracellular matrix organization            |
| Fibrillin-1                                                          | 0.84                     | 7                            | 40                         | Elastic fiber assembly                       |
| Decorin                                                              | 0.85                     | 3                            | 8                          | Extracellular matrix organization            |
| Hemoglobin subunit beta-1                                            | 0.87                     | 8                            | 13                         | Oxygen transport                             |
| Lysyl oxidase homolog 1                                              | 0.87                     | 7                            | 15                         | Elastic fiber assembly                       |
| Transgelin                                                           | 0.89                     | 3                            | 14                         | Muscle protein                               |
| Fibronectin                                                          | 0.90                     | 12                           | 35                         | Extracellular matrix organization            |
| Prelamin-A/C                                                         | 0.90                     | 8                            | 26                         | Nucleus organization                         |
| Protein-glutamine gamma-glutamyltransferase 2                        | 0.91                     | 4                            | 13                         | G-protein coupled receptor signaling pathway |
| Actin, cytoplasmic 1                                                 | 0.91                     | 3                            | 4                          | Actin cytoskeleton organization              |
| Basement membrane-specific heparan sulfate proteoglycan core protein | 0.92                     | 8                            | 37                         | Extracellular matrix organization            |
| Myosin-11                                                            | 0.94                     | 36                           | 90                         | Muscle contraction                           |
| Creatine kinase B-type                                               | 0.95                     | 3                            | 3                          | Cellular chloride ion homeostasis            |

|                                       |      |    |    |                                    |
|---------------------------------------|------|----|----|------------------------------------|
| Actin, aortic smooth muscle           | 0.95 | 15 | 23 | Muscle contraction                 |
| Collagen alpha-1(VI) chain            | 0.95 | 4  | 16 | Extracellular matrix organization  |
| Myosin regulatory light polypeptide 9 | 0.95 | 3  | 7  | Muscle contraction                 |
| ATP synthase subunit beta             | 0.97 | 4  | 11 | ATP biosynthetic process           |
| Filamin-A                             | 0.99 | 29 | 81 | Actin cytoskeleton organization    |
| Vimentin                              | 0.99 | 14 | 25 | Intermediate filament organization |
| Tubulin alpha-1A                      | 1.00 | 3  | 9  | Microtubule organization           |
| Collagen alpha-1(I) chain             | 1.00 | 6  | 8  | Extracellular matrix organization  |
| Myosin light polypeptide 6            | 1.01 | 3  | 7  | Muscle contraction                 |
| Myosin-4                              | 1.02 | 3  | 30 | Muscle contraction                 |
| Alpha-actinin-1                       | 1.02 | 10 | 21 | Actin cytoskeleton organization    |
| Talin-1                               | 1.03 | 6  | 24 | Actin cytoskeleton organization    |
| ATP synthase subunit alpha            | 1.03 | 3  | 10 | ATP biosynthetic process           |
| Histone H2B type 3-A                  | 1.06 | 3  | 6  | DNA-binding                        |
| Collagen alpha-2(I) chain             | 1.09 | 4  | 7  | Extracellular matrix organization  |
| Tubulin beta-5 chain                  | 1.17 | 3  | 8  | Microtubule organization           |

Identified peptides: number of peptides with MASCOT individual ion score above 20.  
 Quantifiable peptides: number of Identified peptides with quantitation ratio (C/- versus +/+). N=5 in each group.



**Table S3.** Aortic geometry of the mice infused with 500 ng/kg/min of AngII and fed with a western diet

| Parameters                             |    | +/+ (n=5)        | +/- (n=3)        | C/- (n=7)        | P-value |
|----------------------------------------|----|------------------|------------------|------------------|---------|
| Medial thickness ( $\mu\text{m}$ )     | TA | 36.54 $\pm$ 0.37 | 33.13 $\pm$ 3.24 | 36.97 $\pm$ 2.39 | 0.55    |
|                                        | AA | 33.36 $\pm$ 1.00 | 32.33 $\pm$ 1.94 | 32.48 $\pm$ 1.55 | 0.89    |
| Elastic fiber content (arbitrary unit) | TA | 1.67 $\pm$ 0.24  | 1.67 $\pm$ 0.17  | 1.36 $\pm$ 0.11  | 0.36    |
|                                        | AA | 1.48 $\pm$ 0.30  | 0.79 $\pm$ 0.06  | 1.14 $\pm$ 0.23  | 0.29    |
| Mean distance between elastic lamellae | TA | 6.75 $\pm$ 0.21  | 6.25 $\pm$ 0.58  | 7.25 $\pm$ 0.48  | 0.37    |
|                                        | AA | 7.40 $\pm$ 0.23  | 7.49 $\pm$ 0.68  | 7.26 $\pm$ 0.40  | 0.93    |
| Number of elastic lamellae             | TA | 5.45 $\pm$ 0.20  | 5.31 $\pm$ 0.11  | 5.12 $\pm$ 0.07  | 0.20    |
|                                        | AA | 4.53 $\pm$ 0.14  | 4.38 $\pm$ 0.15  | 4.48 $\pm$ 0.20  | 0.89    |

TA: thoracic aorta. AA: abdominal aorta. Elastic fiber content was quantified by the ratio of elastic fiber staining area to the medial area. Elastic fiber staining area was selected manually by a specific RGB threshold and quantified by HistoQuest software (TissueGnostics). *P*-value is resulted from one-way ANOVA analysis between three groups.

**Table S4.** Aortic geometry of the mice infused with 1000 ng/kg/min of AngII and fed with a western diet.

| Parameters                                                  |    | +/+ (n=3)         | C/- (n=6)         |
|-------------------------------------------------------------|----|-------------------|-------------------|
| Medial thickness ( $\mu\text{m}$ )                          | TA | 76.27 $\pm$ 16.99 | 61.78 $\pm$ 3.35  |
|                                                             | AA | 82.98 $\pm$ 17.33 | 55.42 $\pm$ 10.65 |
| Elastic fiber content<br>(arbitrary unit)                   | TA | 0.76 $\pm$ 0.07   | 1.10 $\pm$ 0.16   |
|                                                             | AA | 0.92 $\pm$ 0.22   | 1.04 $\pm$ 0.24   |
| Elastic fiber breaks<br>(Breaks per 10000 $\mu\text{m}^2$ ) | TA | 0.56 $\pm$ 0.13   | 1.22 $\pm$ 0.26   |
|                                                             | AA | 1.06 $\pm$ 0.40   | 4.06 $\pm$ 1.07 * |
| Mean distance between elastic lamellae                      | TA | 13.83 $\pm$ 2.73  | 12.69 $\pm$ 0.90  |
|                                                             | AA | 16.57 $\pm$ 1.97  | 11.73 $\pm$ 2.34  |
| Number of elastic lamellae                                  | TA | 5.51 $\pm$ 0.13   | 4.94 $\pm$ 0.12 * |
|                                                             | AA | 4.92 $\pm$ 0.51   | 4.77 $\pm$ 0.88   |

TA: thoracic aorta. AA: abdominal aorta. *P*-value is resulted from Student's *t* test. \**P* < 0.05 compared with *Pparg*<sup>+/+</sup> mice.

**Table S5.** Sequences of primers used for real-time PCR.

| <b>Gene</b>   |         | <b>Sequence</b>                   | <b>Amplicon</b> |
|---------------|---------|-----------------------------------|-----------------|
| <i>Mmp2</i>   | Forward | CCC CGA TGC TGA TAC TGA           | 152 bp          |
|               | Reverse | CTG TCC GCC AAA TAA ACC           |                 |
| <i>Mmp9</i>   | Forward | CCT GGA ACT CAC ACG ACA TCT TC    | 82 bp           |
|               | Reverse | TGG AAA CTC ACA CGC CAG AA        |                 |
| <i>Mmp7</i>   | Forward | GCA GGC ATT CAG AAG TTA TAT G     | 168 bp          |
|               | Reverse | ACC CAT CCA CAG CAC AAG           |                 |
| <i>Mmp12</i>  | Forward | CCC ACT TCG CCA AAA GGT TT        | 73 bp           |
|               | Reverse | CAT GAG CTC CTG CCT CAC ATC       |                 |
| <i>Ctss</i>   | Forward | GGT TGG CTA TGG GAC TCT TG        | 123 bp          |
|               | Reverse | GCA ATT CCG CAG TGA TTT TT        |                 |
| <i>Timp1</i>  | Forward | ATT CAA GGC TGT GGG AAA TG        | 183 bp          |
|               | Reverse | CTC AGA GTA CGC CAG GGA AC        |                 |
| <i>Timp2</i>  | Forward | CAC GCT TAG CAT CAC CCA           | 134 bp          |
|               | Reverse | TGA CCC AGT CCA TCC AGA G         |                 |
| <i>Tnf</i>    | Forward | CAT CTT CTC AAA ATT CGA GTG ACA A | 175 bp          |
|               | Reverse | TGG GAG TAG ACA AGG TAC AAC CC    |                 |
| <i>Il1b</i>   | Forward | GCA ACT GTT CCT GAA CTC AAC T     | 89 bp           |
|               | Reverse | ATC TTT TGG GGT CCG TCA AT        |                 |
| <i>Ccl2</i>   | Forward | CCC ACT CAC CTG CTG CTA CT        | 164 bp          |
|               | Reverse | TCT GGA CCC ATT CCT TCT TG        |                 |
| <i>Adgre1</i> | Forward | CTT TGG CTA TGG GCT TCC AGT C     | 165 bp          |
|               | Reverse | GCA AGG AGG ACA GAG TTT ATC GTG   |                 |
| <i>Eln</i>    | Forward | CTG CCA AAG CTG CCA AAT AC        | 99 bp           |
|               | Reverse | CTC CAG CTC CAA CAC CAT AG        |                 |
| <i>Fbln4</i>  | Forward | GGG TTA TTT GTG TCT GCC TCG       | 218 bp          |
|               | Reverse | TGG TAG GAG CCA GGA AGG TT        |                 |
| <i>Fbln5</i>  | Forward | TCC AAC TAC CCC ACG ATT TCA AG    | 229 bp          |
|               | Reverse | GGC AGT AAC CAT AGC GAC ATT C     |                 |
| <i>Fbn1</i>   | Forward | TCA TCG GAG GCT ATA GGT GTA GCT   | 90 bp           |
|               | Reverse | CAC TCA GGC ACT CGT TTT CAT C     |                 |
| <i>Col1a1</i> | Forward | TCA GAG GCG AAG GCA ACA GTC       | 120 bp          |
|               | Reverse | GCA GGC GGG AGG TCT TGG           |                 |
| <i>Col3a1</i> | Forward | GAC AGA TTC TGG TGC AGA GA        | 107 bp          |

|                    |         |                                   |        |
|--------------------|---------|-----------------------------------|--------|
|                    | Reverse | CAT CAA CGA CAT CTT CAG GAA T     |        |
| <i>Lox</i>         | Forward | GTC ACC AAC ATT ACC ACA GCA       | 186 bp |
|                    | Reverse | CAT AAC ATC CAG GAC TCA ATC C     |        |
| <i>Lox11</i>       | Forward | CTA TGC CTG CAC CTC TCA CA        | 112 bp |
|                    | Reverse | GTA GTT CCC AGG CTG CAC AT        |        |
| <i>Eln chip</i>    | Forward | CCT CTA TGC CCT GTA CTG TAT AAG A | 241 bp |
|                    | Reverse | AGG CTT TAA GGA ATG TGA AGT GTA G |        |
| <i>Fbln5 chip</i>  | Forward | GAT GCA CAA ATA CCC GCC AT        | 80 bp  |
|                    | Reverse | TTG ATG AAT GCC GGA CCA TC        |        |
| <i>Pparg</i>       | Forward | CAT AAA GTC CTT CCC GCT GA        | 91 bp  |
|                    | Reverse | CAT GTC GTA GAT GAC AAA TGG       |        |
| rat <i>Eln</i>     | Forward | CTG CAT CCA AAG CTG CTA AA        | 157 bp |
|                    | Reverse | CCT GCT ACT CCA CCA GGA AC        |        |
| rat <i>Fbln5</i>   | Forward | GGA CCA GCC ATT CAC CAT CTT       | 90 bp  |
|                    | Reverse | GTC GTT GCT TGC ATC TGG AA        |        |
| rat <i>Mmp9</i>    | Forward | TGG ATC CCC AGA GCG TTA CT        | 93 bp  |
|                    | Reverse | AAT AGG CCT TGT CTT GGT AGT GAA A |        |
| human <i>PPARG</i> | Forward | GAG CCC AAG TTT GAG TTT GC        | 198 bp |
|                    | Reverse | CTG TGA GGA CTC AGG GTG GT        |        |
| human <i>ELN</i>   | Forward | GGA GGA CTC GGA GTC GGA G         | 101 bp |
|                    | Reverse | CCA GCA GCA CCG TAT TTA GCT       |        |
| human <i>FBLN5</i> | Forward | GGA TCA GTG ATA ACC GCT GTA TGT   | 81 bp  |
|                    | Reverse | TGT CCC GGT ACA AGA TGG TAA AG    |        |

---

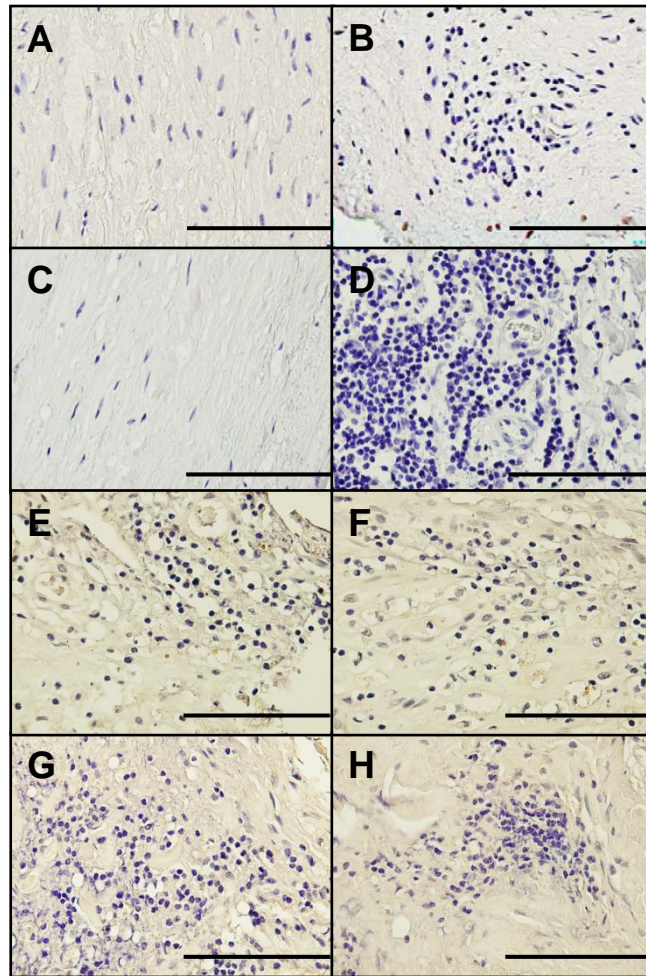

**Figure S1.** Negative controls of immunohistochemical staining of PPAR $\gamma$  in normal human abdominal aorta (**A** and **B**) and human AAA (**C-H**). The controls were no primary antibody (**A-D**), primary antibody isotype control (**E** and **F**) and no antigen retrieval (**G** and **H**) followed by incubation with secondary antibodies and detection reagents. Scale bars are 100  $\mu$ m.

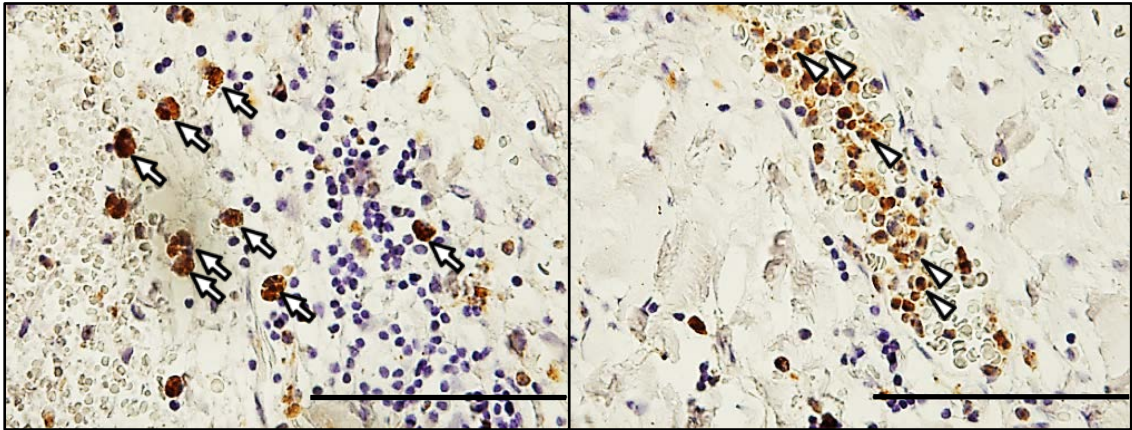

**Figure S2.** Immunohistochemical staining of CD68 in human AAA. A small portion of CD68-positive cells were found in the adventitia of human AAA. Some CD68-positive cells with larger cytoplasm and irregular shape are macrophages (left picture, open arrow). Other CD68-positive cells with smaller size and lightly stained nuclei are likely monocytes (right picture, open arrowhead).

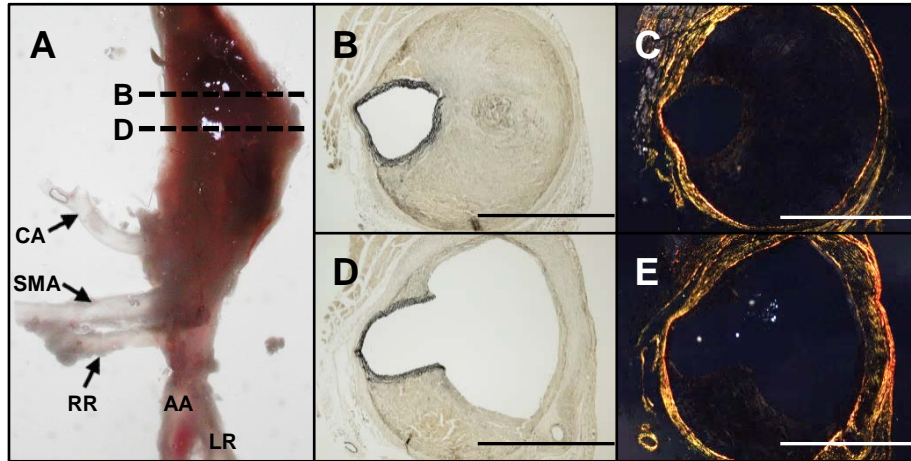

**Figure S3.** AngII-induced dissecting AAA in a wild-type mouse treated at 1000 ng/kg/min for 4 weeks. **A**, Gross view of aneurysm characterized by the bulge of upper portion of the suprarenal aorta. Verhoeff's stain of the section (**B**) from the upper portion shows intact tunica media and with large but organized intramural hematoma that is enclosed within relatively intact adventitia shown by the collagen in (**C**) (polarized view of PS red stained section). Section (**D**) shows torn tunica media and severely dilated false lumen that are hold by the organized hematoma and adventitia. Thickening of adventitia is highlighted by the extensive collagen synthesis in (**E**). Collagen in the organized hemostatic plugs in (**C**) and (**E**) are very limited. Scale bars are 1000  $\mu$ m.



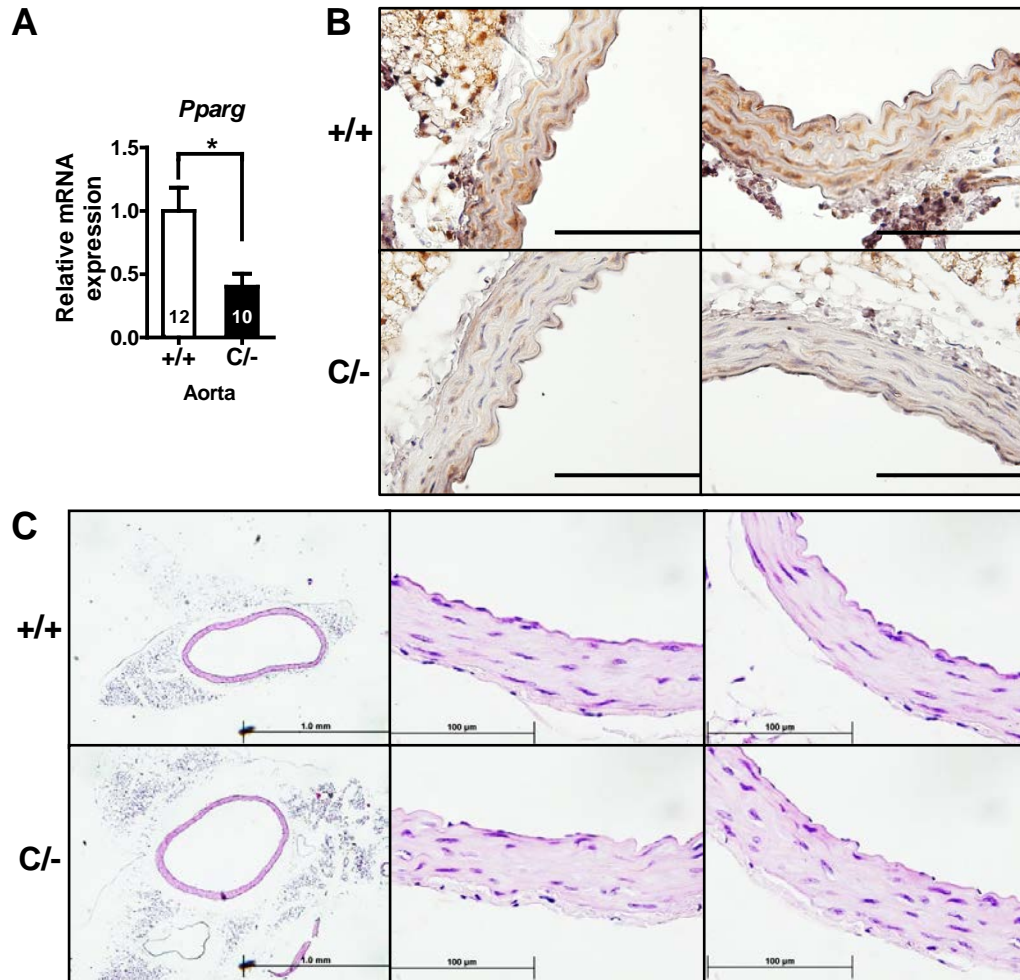

**Figure S4.** **A**, mRNA level of PPAR $\gamma$  in the *Pparg*<sup>C/-</sup> aorta is 40% normal. \* $P < 0.05$  compared with *Pparg*<sup>+/+</sup> mice. **B**, Immunohistochemical staining of PPAR $\gamma$  in *Pparg*<sup>+/+</sup> and *Pparg*<sup>C/-</sup> aorta, confirming the reduction of PPAR $\gamma$  protein in the *Pparg*<sup>C/-</sup> aorta. Scale bars are 100  $\mu$ m. **C**, H&E staining of the cross-section of aorta indicates normal vascular dimension of the *Pparg*<sup>C/-</sup> aorta.



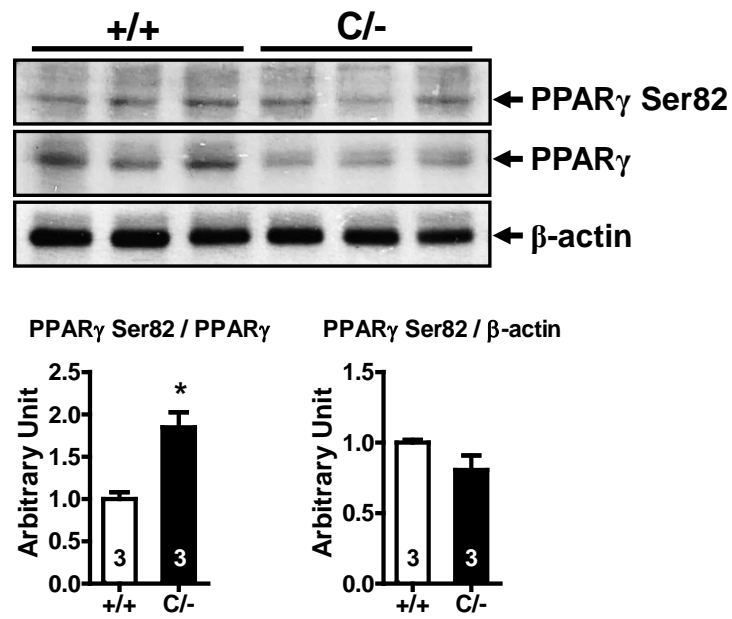

**Figure S5.** Ser82 phosphorylation of PPAR $\gamma$  in aorta was determined by immunoblotting using antibodies against P-Ser82 PPAR $\gamma$  and PPAR $\gamma$ . The relative ratio of P-Ser82 PPAR $\gamma$  to total PPAR $\gamma$  was significantly higher (1.8X,  $P < 0.05$ ) in *Pparg*<sup>C/-</sup> aorta than in *Pparg*<sup>+/+</sup> aorta, while the relative ratio of P-Ser82 PPAR $\gamma$  to  $\beta$ -actin did not differ.

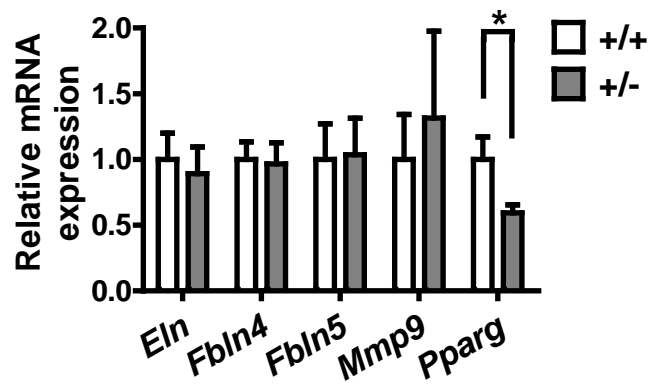

**Figure S6.** Expression of ECM components and MMP-9 in *Pparg*<sup>+/-</sup> aorta. Data are expressed relative to the mean in *Pparg*<sup>+/+</sup> aorta as 1.0 (+/+ = 5, +/- = 5). \**P*<0.05 compared with *Pparg*<sup>+/+</sup> mice.

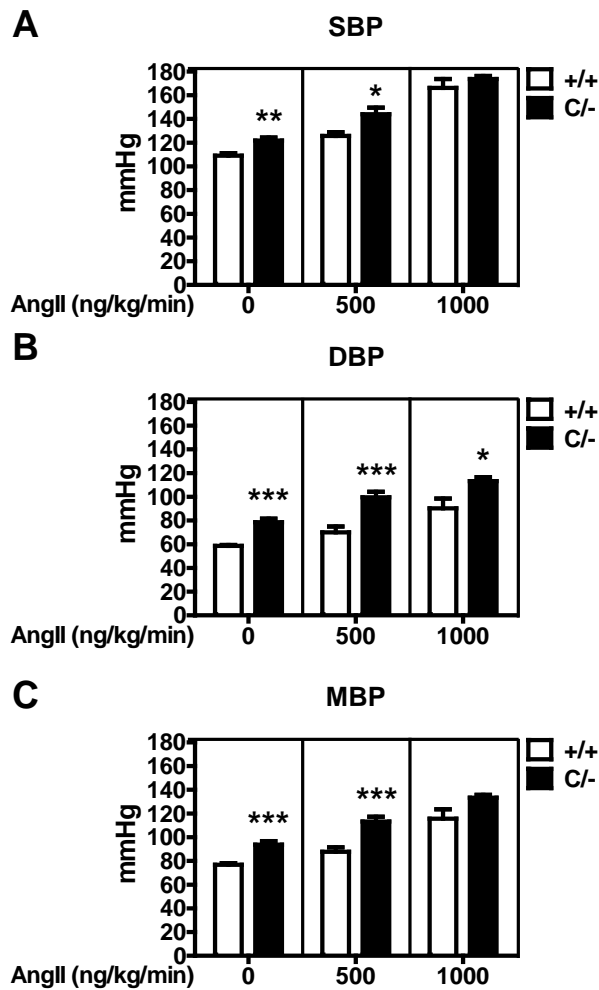

**Figure S7.** Tail-cuff BP measurements in mice infused with AngII (0, 500, or 1000 ng/kg/min) and fed with a western diet for 4 weeks. SBP: systolic BP. DBP: diastolic BP. MBP: mean BP. N=6, 9 and 4 in each genotype of AngII 0, 500, 1000 ng/kg/min groups, respectively.

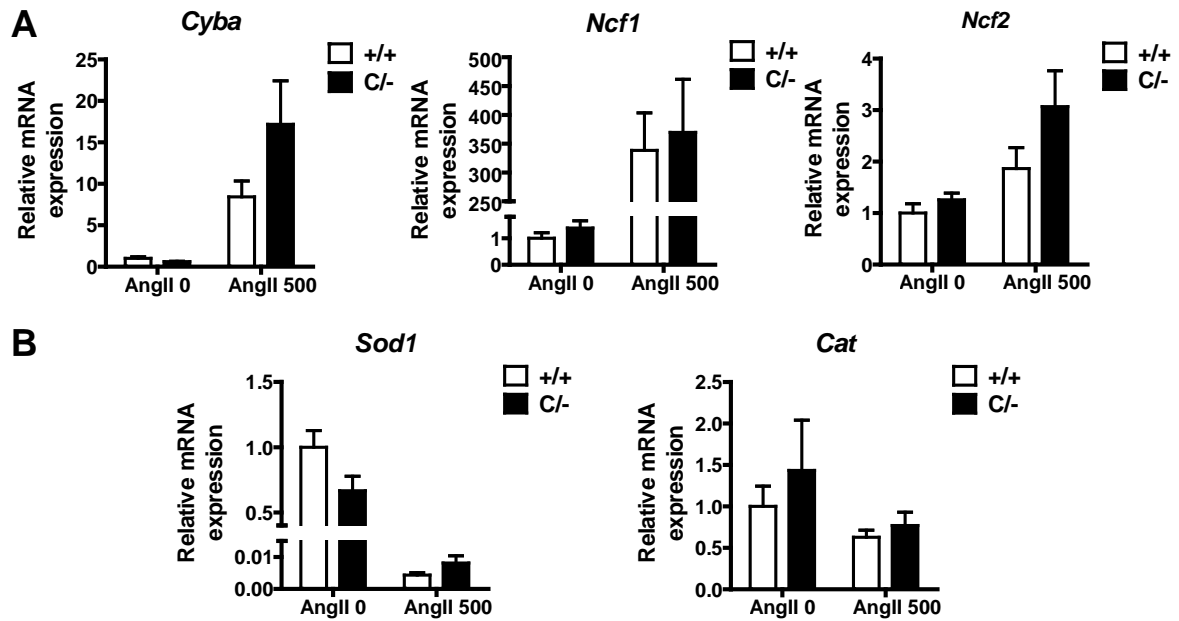

**Figure S8.** Expression of (A) pro-oxidant and (B) anti-oxidant enzymes in *Pparg*<sup>C/-</sup> and *Pparg*<sup>+/+</sup> aorta without and with AngII (500 ng/kg/min) infusion for 4 weeks. Data are expressed relative to the mean in untreated *Pparg*<sup>+/+</sup> aorta as 1.0 (N=5~7 in each genotype). Two-way ANOVA analysis showed that treatment of AngII had significant effect on expression of *Cyba* ( $P < 0.001$ ), *Ncf1* ( $P < 0.001$ ), *Ncf2* ( $P = 0.078$ ), *Cat* ( $P < 0.01$ ) and *Sod1* ( $P < 0.001$ ). However, neither PPAR $\gamma$  genotype effect nor interaction between AngII and genotype was found in expression of all these genes.

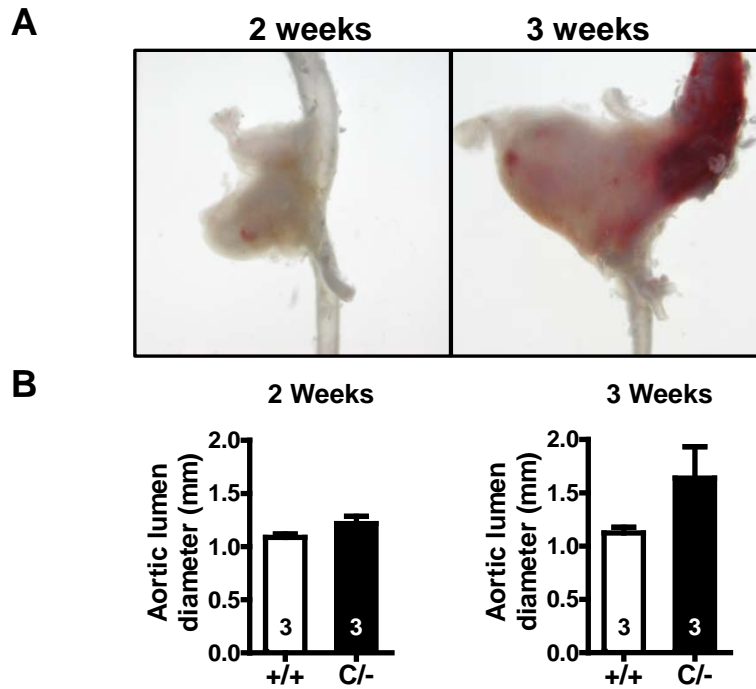

**Figure S9.** Time course of AAA development in AngII-infused *Pparg*<sup>C/-</sup> mice. **A**, Representative photographs of AAA and **(B)** suprarenal aortic lumen diameter measured by ultrasound imaging in the mice of 2 and 3 weeks post-AngII (1000 ng/kg/min) infusion. N=3 in each group.



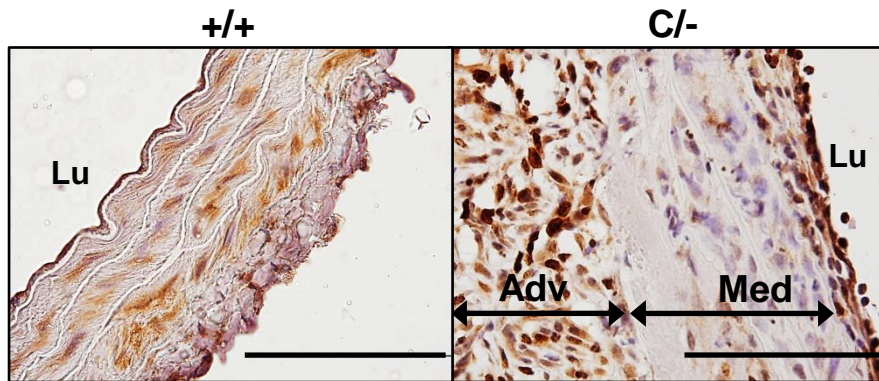

**Figure S11.** Immunohistochemical staining of Ki-67 in dilated *Pparg*<sup>C/-</sup> SMA and *Pparg*<sup>+/+</sup> AA after AngII (1000 ng/kg/min) infusion for 4 weeks. The dilated adventitia of *Pparg*<sup>C/-</sup> SMA shows a dramatic increase of Ki67-positive signal. Lu: lumen; Med: media; Adv: adventitia. Scale bars are 100  $\mu$ m.

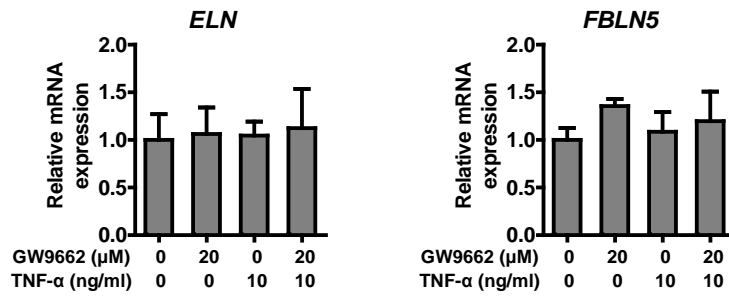

**Figure S12.** Expression of *ELN* and *FBLN5* after treatment with GW9662 or TNF- $\alpha$  in HASMCs. Data are expressed relative to the mean in untreated groups as 1.0 (N=3 in each group).
